# Supplementary material for: Hunga Tonga-Hunga Ha’apai Volcano Impact Model Observation Comparison (HTHH-MOC) Project: Experiment Protocol and Model Descriptions
Source: Copernicus journal article supplement (doi:10.5194/egusphere-2024-3412), 2024-11-18
Supplement: Supplementary file 1 [file egusphere-2024-3412-supplement-version1.zip]

## Sheet: Atm dynamics
Monthly mean are required for all variables on plev 39 + for Mesospheric analysis (EXP4) adding 0.02, 0.01, 0.007, 0.005, 0.003, 0.001 above plev 39 grid. See special request for daily mean in this sheet.
diagnostics (all on pressure levs)	variable_name (appear on filename)	units	daily means for EXP1?	If participate in EXP4, EXP1 free run should also include daily means of these variables for the first 5 years:
zonal wind	ua	m s-1	850, 500, 300, 100,70, 50, 30, 10,1 hPa	1 hPa, 0.1 hPa, 0.01 hPa, and 0.001 hPa
meridional wind	va	m s-1	850, 500, 300, 100,70, 50, 30, 10,1 hPa	1 hPa, 0.1 hPa, 0.01 hPa, and 0.001 hPa
vertical wind	wa	m s-1	850, 500, 300, 100,70, 50, 30, 10,1 hPa	1 hPa, 0.1 hPa, 0.01 hPa, and 0.001 hPa
omega	wap	Pa s-1	850, 500, 300, 100,70, 50, 30, 10,1 hPa	1 hPa, 0.1 hPa, 0.01 hPa, and 0.001 hPa
temperature	ta	K	850, 500, 300, 100,70, 50, 30, 10,1 hPa	1 hPa, 0.1 hPa, 0.01 hPa, and 0.001 hPa
specific humidity	hus	1	850, 500, 300, 100,70, 50, 30, 10,1 hPa	1 hPa, 0.1 hPa, 0.01 hPa, and 0.001 hPa
potential temperature	theta	K	850, 500, 300, 100,70, 50, 30, 10,1 hPa	1 hPa, 0.1 hPa, 0.01 hPa, and 0.001 hPa
potential vorticity	vorpot	K m2 kg-1 s-1	850, 500, 300, 100,70, 50, 30, 10,1 hPa	1 hPa, 0.1 hPa, 0.01 hPa, and 0.001 hPa
Potential Vorticity on 840K	vorpot850	K m2 kg-1 s-1	yes
Potential Vorticity on 480K	vorpot480	K m2 kg-1 s-1	yes
volume of gridbox	vol	m3	-
pressure	p	Pa	850, 500, 300, 100,70, 50, 30, 10,1 hPa	1 hPa, 0.1 hPa, 0.01 hPa, and 0.001 hPa
geopotential height	zg	m	850, 500, 300, 100,70, 50, 30, 10,1 hPa	1 hPa, 0.1 hPa, 0.01 hPa, and 0.001 hPa
TEM v*	vtem	m s-1	850, 500, 300, 100,70, 50, 30, 10,1 hPa	montly mean at 1 hPa, 0.1 hPa, 0.01 hPa, and 0.001 hPa		2D (zonal-mean) field	gmd-9-3413-2016.pdf (copernicus.org)
TEM w*	wtem	m s-1	850, 500, 300, 100,70, 50, 30, 10,1 hPa	montly mean at 1 hPa, 0.1 hPa, 0.01 hPa, and 0.001 hPa		2D (zonal-mean) field
TEM Fy	epfy	m3 s-2	850, 500, 300, 100,70, 50, 30, 10,1 hPa	montly mean at 1 hPa, 0.1 hPa, 0.01 hPa, and 0.001 hPa		2D (zonal-mean) field
TEM Fz	epfz	m3 s-2	850, 500, 300, 100,70, 50, 30, 10,1 hPa	montly mean at 1 hPa, 0.1 hPa, 0.01 hPa, and 0.001 hPa		2D (zonal-mean) field
TEM div(F)	utendepfd	m s-2	850, 500, 300, 100,70, 50, 30, 10,1 hPa	montly mean at 1 hPa, 0.1 hPa, 0.01 hPa, and 0.001 hPa		2D (zonal-mean) field
meridional heat flux, V'TH'	vth	m K s-1	850, 500, 300, 100,70, 50, 30, 10,1 hPa	1 hPa, 0.1 hPa, 0.01 hPa, and 0.001 hPa
vertical heat flux, W'TH'	wth	m K s-1	850, 500, 300, 100,70, 50, 30, 10,1 hPa	1 hPa, 0.1 hPa, 0.01 hPa, and 0.001 hPa
meridional momentum flux, U'V'	uv	m2 s-2	850, 500, 300, 100,70, 50, 30, 10,1 hPa	1 hPa, 0.1 hPa, 0.01 hPa, and 0.001 hPa
vertical momentum, flux U'W'	uw	m2 s-2	850, 500, 300, 100,70, 50, 30, 10,1 hPa	1 hPa, 0.1 hPa, 0.01 hPa, and 0.001 hPa
Eastward Acceleration Due to Gravity Wave Drag	utendgw	m s-2	850, 500, 300, 100,70, 50, 30, 10,1 hPa (zonal-means only for daily)	1 hPa, 0.1 hPa, 0.01 hPa, and 0.001 hPa
Eastward Acceleration Due to Orographic Gravity Wave Drag	utendogw	m s-2	850, 500, 300, 100,70, 50, 30, 10,1 hPa (zonal-means only for daily)	1 hPa, 0.1 hPa, 0.01 hPa, and 0.001 hPa
Upward Flux of Eastward Momentum Due to Orographic GWD	ogwemflux	Pa	850, 500, 300, 100,70, 50, 30, 10,1 hPa (zonal-means only for daily)	1 hPa, 0.1 hPa, 0.01 hPa, and 0.001 hPa
Eastward Acceleration Due to Non-Orographic Gravity Wave Drag	utendnogw	m s-2	850, 500, 300, 100,70, 50, 30, 10,1 hPa (zonal-means only for daily)	1 hPa, 0.1 hPa, 0.01 hPa, and 0.001 hPa		same as UTGWSPEC+BUTGWSPEC (so frontal + convective gravity drag) in CESM
Upward Flux of Eastward Momentum Due to Eastward Propogating Non-Orographic Gravity Waves	nogwfluxw	Pa	850, 500, 300, 100,70, 50, 30, 10,1 hPa (zonal-means only for daily)	1 hPa, 0.1 hPa, 0.01 hPa, and 0.001 hPa
Upward Flux of Eastward Momentum Due to Westward Propogating Non-Orographic Gravity Waves	nogwfluxe	Pa	850, 500, 300, 100,70, 50, 30, 10,1 hPa (zonal-means only for daily)	1 hPa, 0.1 hPa, 0.01 hPa, and 0.001 hPa
Eastward Acceleration Due to Numerical Artefacts	diabdrag	m s-2	850, 500, 300, 100,70, 50, 30, 10,1 hPa (zonal-means only for daily)	1 hPa, 0.1 hPa, 0.01 hPa, and 0.001 hPa
surface temperature (TS)	ts	K	yes
near-surface air temperature (tas)	tas	K	yes
Daily Minimum Near-Surface Air Temperature	tasmax	K	yes
Daily Maximum Near-Surface Air Temperature	tasmin	K	yes
precipitation	pr	kg m-2 s-1	yes
surface pressure	ps	Pa	yes
sea level pressure	psl	Pa	yes
tropopause height	ztp	m	yes
tropopause pressure	ptp	Pa	yes
tropopause temperature	tatp	K	yes
sea-ice fraction	siconca	%	yes

## Sheet: Cloud and PSCs
Monthly mean are required for all variables on plev 39 + for Mesospheric analysis (EXP4) adding 0.02, 0.01, 0.007, 0.005, 0.003, 0.001 above plev 39 grid. See special request for daily mean in this sheet.
diagnostics (all on pressure levs)	variable_name(appear on filename)	units	daily means for EXP1?
Total Cloud Cover Percentage	cl	%
Convective Cloud Cover Percentage	clc	%
Cloud Optical Depth	cod	1	yes
cloud top		m
liquid water path	lwp	g m-2
ice water path	iwp	g m-2
cloud water path	cwp	g m-2
STS/sulfate SAD	sad_STS	m2 m-3	300, 100, 70, 50,10 hPa
STS/sulfate mmr	mmr_STS	kg kg-1	300, 100, 70, 50,10 hPa
ice SAD	sad_icePSC	m2 m-3	300, 100, 70, 50,10 hPa
ice mmr	mmr_icePSC	kg kg-1	300, 100, 70, 50,10 hPa
NAT SAD	sad_NAT	m2 m-3	300, 100, 70, 50,10 hPa
NAT mmr	mmr_NAT	kg kg-1	300, 100,70, 50,10 hPa
3D field (optional)
ice cloud fraction	icf	%
liquid cloud fraction	lcf	%
total cloud fraction	cf	%
liquid water content	lwc	g m-3
ice water content	iwc	g m-3
total water content	cwc	g m-3
ice number density	nd_ic	L-1
liquid number density	nd_lc	L-1
ice effective radius	re_ic	um
liquid effective radius	re_lc	um

## Sheet: Atm chemistry
diagnostics	variable_name (appear on filename)	units	daily means for EXP1?	notes	If participate in EXP4, EXP1 free run should also include daily means of these variables for the first 5 years:
O3	o3	mol mol-1	850, 500, 300, 200, 100,70, 50, 30, 10,1 hPa	daily mean, 0UTC and 12UTC for EXP2	1 hPa, 0.1 hPa, 0.01 hPa, and 0.001 hPa
Monthly mean are required for all variables on plev 39 + for Mesospheric analysis (EXP4) adding 0.02, 0.01, 0.007, 0.005, 0.003, 0.001 above plev 39 grid. See special request for daily mean in this sheet.
total ozone column	to3	DU	yes	daily mean, 0UTC and 12UTC for EXP2
O3 prod	o3_prod	molec-1s-1	850, 500, 300, 200, 100,70, 50, 30, 10,1 hPa		1 hPa, 0.1 hPa, 0.01 hPa, and 0.001 hPa
chemical O3 loss	o3_loss	molec-1s-1	850, 500, 300, 200, 100,70, 50, 30, 10,1 hPa		1 hPa, 0.1 hPa, 0.01 hPa, and 0.001 hPa
O3 STE ?	o3_ste ?
O3S (following CCMI protocol)	o3strat	mol mol-1	850, 500, 300, 200, 100,70, 50, 30, 10,1 hPa		1 hPa, 0.1 hPa, 0.01 hPa, and 0.001 hPa
age of air (following CCMI protocol)	meanage	yr	850, 500, 300, 200, 100,70, 50, 30, 10,1 hPa		1 hPa, 0.1 hPa, 0.01 hPa, and 0.001 hPa
total reactive Clx = ClO+Cl+Cl2+OClO+OOCl+Cl2+HOCl+Cl	clx	mol mol-1	500,100,50,10,1 hPa
total reactive Brx = BrO + ?	brx	mol mol-1	500,100,50,10,1 hPa
total inorganic Cl (Cly)	cly	mol mol-1	500,100,50,10,1 hPa
total inorganic Br (Bry)	bry	mol mol-1	500,100,50,10,1 hPa
total Cl	cltot	mol mol-1	500,100,50,10,1 hPa
total Br	brtot	mol mol-1	500,100,50,10,1 hPa
Mole fractions of:
HCl	hcl	mol mol-1	500,100,50,10,1 hPa	daily mean, 0UTC and 12UTC for EXP2
ClO	clo	mol mol-1	500,100,50,10,1 hPa	daily mean, 0UTC and 12UTC for EXP2
Cl	cl	mol mol-1	-	daily mean, 0UTC and 12UTC for EXP2
Cl2	cl2	mol mol-1	-	daily mean, 0UTC and 12UTC for EXP2
OClO	oclo	mol mol-1	-	daily mean, 0UTC and 12UTC for EXP2
OOCl	oocl	mol mol-1	-	daily mean, 0UTC and 12UTC for EXP2
H2SO4	h2so4	mol mol-1	-	daily mean, 0UTC and 12UTC for EXP2
HBr	hbr	mol mol-1	-	daily mean, 0UTC and 12UTC for EXP2
HOCl	hocl	mol mol-1	500,100,50,10,1 hPa	daily mean, 0UTC and 12UTC for EXP2
HOBr	hobr	mol mol-1	-	daily mean, 0UTC and 12UTC for EXP2
HNO3	hno3	mol mol-1	500,100,50,10,1 hPa	daily mean, 0UTC and 12UTC for EXP2
N2O5	n2o5	mol mol-1	500,100,50,10,1 hPa	daily mean, 0UTC and 12UTC for EXP2
NO2	no2	mol mol-1	500,100,50,10,1 hPa	daily mean, 0UTC and 12UTC for EXP2
NO	no	mol mol-1	500,100,50,10,1 hPa	daily mean, 0UTC and 12UTC for EXP2
N2O	n2o	mol mol-1	500,100,50,10,1 hPa	daily mean, 0UTC and 12UTC for EXP2
ClONO2	clono2	mol mol-1	500,100,50,10,1 hPa	daily mean, 0UTC and 12UTC for EXP2
ClNO2	clno2	mol mol-1	-	daily mean, 0UTC and 12UTC for EXP2
BrONO2	brono2	mol mol-1	-	daily mean, 0UTC and 12UTC for EXP2
BrNO2	brno2	mol mol-1	-	daily mean, 0UTC and 12UTC for EXP2
BrO	bro	mol mol-1	-	daily mean, 0UTC and 12UTC for EXP2
Br	br	mol mol-1	-	daily mean, 0UTC and 12UTC for EXP2
Br2	br2	mol mol-1	-	daily mean, 0UTC and 12UTC for EXP2
SO2	so2	mol mol-1	-	daily mean, 0UTC and 12UTC for EXP2
OCS	OCS	mol mol-1	-	daily mean, 0UTC and 12UTC for EXP2
H2O	h2o	mol mol-1	850, 500, 300, 200, 100,70, 50, 30, 10,1 hPa	daily mean, 0UTC and 12UTC for EXP2	1 hPa, 0.1 hPa, 0.01 hPa, and 0.001 hPa
OH	oh	mol mol-1	500,100,50,10,1 hPa	daily mean, 0UTC and 12UTC for EXP2
HO2	ho2	mol mol-1	500,100,50,10,1 hPa	daily mean, 0UTC and 12UTC for EXP2
CH4	ch4	mol mol-1	500,100,50,10,1 hPa	daily mean, 0UTC and 12UTC for EXP2
HF	hf	mol mol-1	500,100,50,10,1 hPa	daily mean, 0UTC and 12UTC for EXP2
CFC11, CFC12, CH3Br and other ODS if used	cfc11, cfc12, ch3br etc	mol mol-1	-
ozone loss cycles - Table 1 in Lee et al. (2002, https://doi.org/10.1029/2001JD000538), individually or combined into families	o3loss_cycle1; o3loss_cycle2.. etc	moles m-3 s-1	-
total column O3 - daily mean, inst. at 0UTC, inst. at 12UTC	to3, to3_0utc, to3_12utc	molec cm-2	-
total column ClO - daily mean, inst. at 0UTC, inst. at 12UTC	tclo, tclo_0utc, tclo_12utc	molec cm-2	-
total column OClO - daily mean, inst. at 0UTC, inst. at 12UTC	toclo, toclo_0utc, toclo_12utc	molec cm-2	-
total column OOCl - daily mean, inst. at 0UTC, inst. at 12UTC	toocl, toocl_0utc, toocl_12utc	molec cm-2	-
total column HBr - daily mean, inst. at 0UTC, inst. at 12UTC	thbr, thbr_0utc, thbr_12utc	molec cm-2	-
total column HNO3 - daily mean, inst. at 0UTC, inst. at 12UTC	thno3, thno3_0utc, thno3_12utc	molec cm-2	-
total column NO2 - daily mean, inst. at 0UTC, inst. at 12UTC	tno2, tno2_0utc, tno2_12utc	molec cm-2	-
total column NO - daily mean, inst. at 0UTC, inst. at 12UTC	tno, tno_0utc, tno_12utc	molec cm-2	-
total column N2O - daily mean, inst. at 0UTC, inst. at 12UTC	tn2o, tn2o_0utc, tn2o_12utc	molec cm-2	-
total column ClONO2 - daily mean, inst. at 0UTC, inst. at 12UTC	tclono2, tclobo2_0utc, tclono2_12utc	molec cm-2	-
total column BrONO2 - daily mean, inst. at 0UTC, inst. at 12UTC	tbrono2, tbrono2_0utc, tbrono2_12utc	molec cm-2	-
total column BrO - daily mean, inst. at 0UTC, inst. at 12UTC	tbro, tbro_0utc, tbro_12utc	molec cm-2	-
total column H2O - daily mean, inst. at 0UTC, inst. at 12UTC	th2o, th2o_0utc, th2o_12utc	molec cm-2	-
total column CH4 - daily mean, inst. at 0UTC, inst. at 12UTC	tch4, tch4_0utc, tch4_12utc	molec cm-2	-
total column HF - daily mean, inst. at 0UTC, inst. at 12UTC	thf, thf_0utc, thf_12utc	molec cm-2	-

## Sheet: Aerosols
Monthly mean are required for all variables on plev 39 + for Mesospheric analysis (EXP4) adding 0.02, 0.01, 0.007, 0.005, 0.003, 0.001 above plev 39 grid. See special request for daily mean in this sheet.
diagnostics	variable_name (appear on filename)	units	daily means for EXP1?		Obs
SAD all aerosols	SAD_allaero (should detailed in metadata what aerosol types are included)	cm2/cm3 or um2/cm3 or um2/um3	850, 500, 300, 100,70, 50, 30, 10,1 hPa		GloSSAC
SAD sulfate	SAD_sulfate	cm2/cm3 or um2/cm3 or um2/um3	850, 500, 300, 100,70, 50, 30, 10,1 hPa
Stratospheric aerosol optical depth 1020 nm day night	SAOD_1020	1	850, 500, 300, 100,70, 50, 30, 10,1 hPa
Stratospheric aerosol optical depth 550 nm day night	SAOD_550	1	850, 500, 300, 100,70, 50, 30, 10,1 hPa
aerosol optical depth 1020 nm day night	AOD_1020	1
aerosol optical depth 550 nm day night	AOD_550	1
Stratospheric aerosol optical depth 385 nm or UV band day night (optional)	SAOD_385	1
Stratospheric aerosol optical depth 750 nm day night (optional)	SAOD_750	1			OMPS ()
Aerosol extinction 1020 nm day night	EXT_1020	1/km	850, 500, 300, 100,70, 50, 30, 10,1 hPa
Aerosol extinction 550 nm day night	EXT_550	1/km	850, 500, 300, 100,70, 50, 30, 10,1 hPa
Aerosol absorption 1020 nm day night	ABS_1020	1/km
Aerosol absorption 550 nm day night	ABS_550	1/km
Aerosol extinction 385 nm or UV band day night (optional)	EXT_385	1/km
Aerosol extinction 750 nm day night (optional)	EXT_750	1/km
Sulfate aerosol concentration (dry mixing ratio)	sulfmmr	kg kg-1
sulfate MMR in different modes	sulfmmr_mode1, ...	kg kg-1
sea salt MMR in different modes	saltmmr_mode1,...	kg kg-1
primary OM MMR in different modes	pommmr_mode1,...	kg kg-1
secondary OM MMR in different modes	soammr_mode1...	kg kg-1
black carbon MMR in different modes	bcmmr_mode1...	kg kg-1
dust MMR in different modes	dustmmr_mode1...	kg kg-1
particle concentration in different modes	nd_mode1...	m-3	850, 500, 300, 100,70, 50, 30, 10,1 hPa
particle diameter in different modes	diameter_mode1...	cm or um	850, 500, 300, 100,70, 50, 30, 10,1 hPa
effecive radius	reff	cm or um	850, 500, 300, 100,70, 50, 30, 10,1 hPa		Balloon, SAGE III-ISS
sulfate weight percent (the weight percent of H2SO4 in the H2O-H2SO4 wet sulfate aerosol)	wtpct	%	850, 500, 300, 100,70, 50, 30, 10,1 hPa		ACE-FTS

## Sheet: Radiation
Monthly mean are required for all variables on plev 39 + for Mesospheric analysis (EXP4) adding 0.02, 0.01, 0.007, 0.005, 0.003, 0.001 above plev 39 grid. See special request for daily mean in this sheet.
diagnostics	variable_name (appear on filename)	units	daily means for EXP1?	If participate in EXP4, EXP1 free run should also include daily means of these variables for the first 5 years:
double call radiation (optional, with and without aerosols (clean sky))
double call radiation (optional, with and without H2O (dry sky))
double call radiation (optional, with and without O3)
short-wave heating rates, clear sky and all sky	tntrlcs, tntrl	K s-1	500,100,50,10,1 hPa	1 hPa, 0.1 hPa, 0.01 hPa, and 0.001 hPa
long-wave heting rates, clear sky and all sky	tntrscs, tntrs	K s-1	500,100,50,10,1 hPa	1 hPa, 0.1 hPa, 0.01 hPa, and 0.001 hPa
TOA LW down, clear-sky and all-sky	FLDTOAcs, FLDTOA	W m-2	-
TOA LW up, clear-sky and all-sky	FLUTOAcs, FLUTOA	W m-2	-
TOA LW net, clear-sky and all-sky	FLNTOAcs, FLNTOA	W m-2	-
TOA SW down, clear-sky and all-sky	FSDTOAcs, FSDTOA	W m-2	-
TOA SW up, clear-sky and all-sky	FSUTOAcs, FSUTOA	W m-2	-
TOA SW net, clear-sky and all-sky	FSNTOAcs, FSNTOA	W m-2	-
tropopause LW down, clear-sky and all-sky	FLDTROPcs, FLDTROP	W m-2	-
tropopause LW up , clear-sky and all-sky	FLUTROPcs, FLUTROP	W m-2	-
tropopause LW net, clear-sky and all-sky	FLNTROPcs, FLNTROP	W m-2	-
tropopause SW down, clear-sky and all-sky	FSDTROPcs, FSDTROP	W m-2	-
tropopause SW up, clear-sky and all-sky	FSUTROPcs, FSUTROP	W m-2	-
tropopause SW net, clear-sky and all-sky	FSNTROPcs, FSNTROP	W m-2	-
surface LW down, clear-sky and all-sky	FLDScs, FLDS	W m-2	-
surafce LW up , clear-sky and all-sky	FLUScs, FLUS	W m-2	-
surface LW net, clear-sky and all-sky	FLNScs, FLNS	W m-2	-
surface SW down, clear-sky and all-sky	FSDScs, FSDS	W m-2	-
surface SW up, clear-sky and all-sky	FSUScs, FSUS	W m-2	-
surface SW net, clear-sky and all-sky	FSNScs, FSNS	W m-2	-
surface solar irradiance for UV calculations, clear sky and all sky	rsdscs, rsds
